# Cerebellar-recipient motor thalamus drives behavioral context-specific movement initiation

Joshua Dacre<sup>1,2,✉</sup>, Matt Colligan<sup>\*1,2</sup>, Julian Ammer<sup>\*1,2</sup>, Julia Schiemann<sup>1,2</sup>, Thomas Clarke<sup>1,2</sup>, Victor Chamosa-Pino<sup>1,2</sup>, Federico Claudi<sup>1,2</sup>, J. Alex Harston<sup>1,2</sup>, Constantinos Eleftheriou<sup>1,2</sup>, Janelle M.P. Pakan<sup>1,2</sup>, Cheng-Chiu Huang<sup>3</sup>, Adam Hantman<sup>3</sup>, Nathalie L. Rochefort<sup>1,2</sup>, Ian Duguid<sup>1,2,✉</sup>.

<sup>1</sup>Centre for Discovery Brain Sciences and Patrick Wild Centre, Edinburgh Medical School: Biomedical Sciences, University of Edinburgh, Edinburgh, EH8 9XD, UK.

<sup>2</sup>Simons Initiative for the Developing Brain, University of Edinburgh, Edinburgh, EH8 9XD, UK.

<sup>3</sup>Janelia Research Campus, HHMI, Ashburn, Virginia, 20147, USA

\*These authors contributed equally to the work.

✉ Corresponding authors: [jdacre@ed.ac.uk](mailto:jdacre@ed.ac.uk), [Ian.Duguid@ed.ac.uk](mailto:Ian.Duguid@ed.ac.uk)

Address for editorial correspondence:

Ian Duguid

Centre for Discovery Brain Sciences

University of Edinburgh

Edinburgh Medical School: Biomedical Sciences

Hugh Robson Building

George Square

Edinburgh

EH8 9XD, UK

Tel. +44 131 650 3113

Email: [Ian.Duguid@ed.ac.uk](mailto:Ian.Duguid@ed.ac.uk)

## 55 **Summary**

56 To initiate goal-directed behavior, animals must transform sensory cues into motor commands  
57 that generate appropriately timed actions. Sensorimotor transformations along the cerebellar-  
58 thalamocortical pathway are thought to shape motor cortical output and movement timing, but  
59 whether this pathway initiates goal-directed movement remains poorly understood. Here, we  
60 recorded and perturbed activity in cerebellar-recipient regions of motor thalamus (dentate /  
61 interpositus nucleus-recipient regions,  $MTh_{DN/IPN}$ ) and primary motor cortex (M1) in mice  
62 trained to execute a cued forelimb lever push task for reward.  $MTh_{DN/IPN}$  population responses  
63 were dominated by a time-locked increase in activity immediately prior to movement that was  
64 temporally uncoupled from cue presentation, providing a fixed latency feedforward motor  
65 timing signal to  $M1_{FL}$ . Blocking  $MTh_{DN/IPN}$  output suppressed cued movement initiation.  
66 Stimulating the  $MTh_{DN/IPN}$  thalamocortical pathway in the absence of the cue recapitulated cue-  
67 evoked M1 membrane potential dynamics and forelimb behavior in the learned behavioral  
68 context, but generated semi-random movements in an altered behavioral context. Thus,  
69 cerebellar-recipient motor thalamocortical input to M1 is indispensable for the generation of  
70 motor commands that initiate goal-directed movement, refining our understanding of how the  
71 cerebellar-thalamocortical pathway contributes to movement timing.

## 72 **Introduction**

73 The ability to generate precisely timed motor actions in response to sensory cues is a hallmark  
74 of mammalian motor control. Movement timing is believed to be mediated by cerebellum-  
75 dependent shaping of motor output (Holmes, 1939) given that damage to, or inactivation of,  
76 the cerebellum results in poorly timed motor actions (Bastian and Thach, 1995; Milak et al.,  
77 1997; Thach, 1975). However, the circuit mechanisms that generate motor timing signals  
78 necessary for goal-directed movement initiation remain unclear. Cerebellar control of goal-  
79 directed movement is predominantly mediated via two distinct pathways, the cerebellar-  
80 rubrospinal tract (Gibson et al., 1985) and the more dominant cerebellar-thalamocortical  
81 pathway (Horne and Butler, 1995). Feedforward excitatory input from the deep cerebellar  
82

83 nuclei (DCN) provides one of the main driver inputs to the motor thalamus and is thought to  
84 be necessary for controlling the timing of simple and complex movements (Ivry and Keele,  
85 1989; Mink and Thach, 1991; Ohmae et al., 2017). But whether the cerebello-thalamocortical  
86 pathway is required for movement initiation has been much debated (Thach, 2013). Neuronal  
87 activity in the dentate and interpositus subdivisions of the deep cerebellar nuclei and their  
88 recipient regions in motor thalamus precedes activity changes in motor cortex and movement  
89 (Bosch-Bouju et al., 2014; Butler et al., 1992; Fortier et al., 1989; Harvey et al., 1979; Mushiake  
90 and Strick, 1993; Thach, 1975, 1978), suggestive of a role in movement initiation. However,  
91 local inactivation of dentate and interpositus nuclei or their recipient regions in motor thalamus  
92 during simple cued forelimb tasks produces variable behavioral outcomes, from no effect  
93 (Miller and Brooks, 1982) to slowing of reaction times (Meyer-Lohmann et al., 1977; Mink and  
94 Thach, 1991; Spidalieri et al., 1983; Thach, 1975) and reduced task engagement (van  
95 Donkelaar et al., 2000). Although suggestive of a role in movement timing, direct causal  
96 evidence supporting a role for the cerebellar-thalamocortical pathway in movement initiation  
97 has been lacking.

98  
99 If the cerebellar-thalamocortical pathway conveys motor timing signals,  $MTh_{DN/IPN}$  activity  
100 could be described by three hypothetical models. Either, (i) population activity rises from a  
101 fixed timepoint prior to movement initiation which is temporally uncoupled from cue onset (i.e.  
102 a motor timing signal that has a fixed onset and fixed slope when aligned to movement); (ii)  
103 population responses rise from cue onset to a timepoint distant from movement initiation (i.e.  
104 variable onset, fixed slope trajectories where  $MTh_{DN/IPN}$  input does not directly correlate with  
105 movement initiation); or (iii)  $MTh_{DN/IPN}$  population responses change from cue onset and are  
106 directly coupled to movement initiation (i.e. linear sensorimotor transformation from cue to  
107 movement, variable onset, variable slope trajectories) (Figures 1a and 1b).

108  
109 To distinguish between these models and to investigate whether the cerebellar-recipient motor  
110 thalamocortical pathway is necessary for goal-directed movement initiation, we employed

111 thalamic population calcium imaging, patch-clamp recordings in M1, and targeted  
112 manipulations in mice trained to execute a cued forelimb push task for reward. We  
113 demonstrate that MTh<sub>DN/IPN</sub> population responses were dominated by a time-locked increase  
114 in activity immediately prior to movement initiation that was temporally uncoupled from cue  
115 presentation, providing a fixed latency feedforward motor timing signal to M1<sub>FL</sub>. Focal  
116 inactivation of MTh<sub>DN/IPN</sub> suppressed layer 5 membrane potential dynamics in forelimb motor  
117 cortex (M1<sub>FL</sub>) and blocked cued movement initiation. Direct stimulation of MTh<sub>DN/IPN</sub> neurons,  
118 or their axon terminals in M1<sub>FL</sub>, in the absence of the cue recapitulated motor cortical activity  
119 dynamics and forelimb behavior in the learned behavioral context, but generated semi-random  
120 movements in an altered behavioral context where the lever and reward were absent.  
121 Together, our findings demonstrate that the cerebellar-recipient motor thalamocortical  
122 pathway conveys essential motor timing signals necessary for the initiation of goal-directed  
123 movement.

124

## 125 **Results**

126 To explore the role of MTh<sub>DN/IPN</sub> in goal-directed movement initiation, we first developed a cued  
127 linear forelimb push task for mice. The design of the task, which incorporates a horizontal  
128 translation lever, required mice to learn the correct wrist and grip orientation to ensure smooth,  
129 friction-reduced horizontal lever movements (4 mm) in response to a 6 kHz auditory cue  
130 (Figure 1c and Video S1). Mice rapidly learned to execute the task (mean = 7.5 days, 95% CI  
131 [6.3, 8.6], N = 16 mice, all data, unless otherwise stated, are presented as mean,  
132 [bootstrapped 95% confidence interval]; last session task success, mean = 0.64 rewards per  
133 cue presentation, 95% CI [0.56, 0.72]), displaying relatively fast reaction times (last session,  
134 median = 0.32s [0.30, 0.34]) and reproducible forelimb kinematic trajectories (Figures 1d-1f,  
135 Video S1).

136

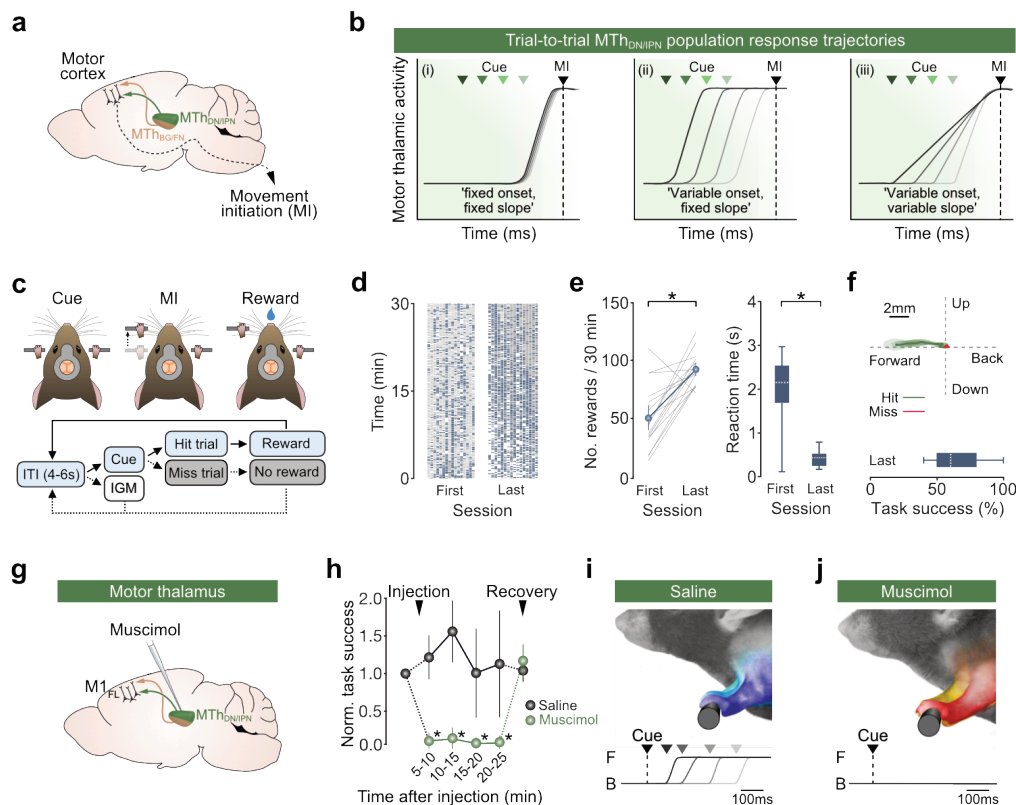

**Figure 1. Motor thalamic output is necessary for cued goal-directed movement initiation in mice.**

(a) Sagittal mouse brain schematic depicting feedforward input from dentate / interpositus nucleus-recipient ( $MTh_{DN/IPN}$ ) and basal ganglia / fastigial nucleus-recipient ( $MTh_{BG/FN}$ ) regions of motor thalamus to motor cortex. (b) Hypothetical trial-to-trial  $MTh_{DN/IPN}$  population response trajectories: model (i), fixed onset, fixed slope; model (ii), variable onset, fixed slope; model (iii), variable onset, variable slope. Green triangles depict cue onset across 4 trials, response trajectories are aligned to movement initiation (MI, black triangle and dashed line). (c) *Top*, cued goal-directed linear forelimb push task for head restrained mice. MI, movement initiation. *Bottom*, behavioral task structure: ITI, inter-trial interval; IGM, internally generated movement. (d) *Left & right*, rasters showing behavioral task success across first and last training sessions. Each column represents the behaviour of an individual mouse across the training session ( $N = 16$ ). Blue, hit trials; grey, miss trials; white, IGMs. (e) Task metrics across learning. *Left*, average number of rewards received per 30 minutes ( $N = 16$  mice,  $t(15) = -5.3$ ,  $*P = 9.5 \times 10^{-5}$ , two-sample  $t$ -test). *Right*, box-and-whisker plots show median, interquartile range and range of median reaction times (RTs) across mice on the first and last day of training ( $N = 16$  mice,  $t(15) = 7.1$ ,  $*P = 3.4 \times 10^{-6}$ , two-sample  $t$ -test). (f) *Top*, average kinematic forepaw trajectory for hit (green) and miss (red) trials from an example mouse shown in Supp. Video 2. Thick line depicts average trajectory overlaid with the 95% CI of frame-by-frame paw position variance (transparent ovals). *Bottom*, box-and-whisker plot showing median, interquartile range and range of task success across mice during last training session. (g) Focal muscimol inactivation of thalamus, targeting  $MTh_{DN/IPN}$ . (h) Normalised task success as a function of time after muscimol injection. Colored symbols represent changes in population means  $\pm$  95% CI after saline (black,  $N = 5$  mice) or muscimol (green,  $N = 5$  mice) injection (5-10 minute bin,  $F(1,8) = 63.0$ ,  $*P = 1.9 \times 10^{-4}$ , 2-way repeated measures ANOVA, with a Bonferroni-Holm correction for multiple comparisons). (i-j) *Top*: Superimposed images of mouse forelimb position at cue onset across 3 trials after (k) saline or (l) muscimol injection targeted to  $MTh_{DN/IPN}$ . *Bottom*: Example lever trajectories from 4 different trials following injection of (k) saline or (l) muscimol into  $MTh_{DN/IPN}$ , demonstrating postural consistency despite motor thalamic inactivation. B, back lever position; F, front lever position; black triangle and dashed line represent cue presentation; grey triangles indicate reaction times.

137

138 To selectively record and manipulate  $MTh_{DN/IPN}$  activity during behavior, we confirmed the

139 anatomical location of thalamic nuclei that send monosynaptic projections to  $M1_{FL}$  and receive

140 dense projections from the dentate (DN) and interpositus (IPN) deep cerebellar nuclei (Gao et

141 al., 2018; Kuramoto et al., 2009; Rispal-Adel et al., 1987; Sakai et al., 1996; Schiemann et

142 al., 2015). By employing conventional retrobead fluorescence tracing across layers 2-6 in

143  $M1_{FL}$ , layer 5-specific monosynaptic rabies tracing and anterograde viral tracing from the DN

144 and IPN, we observed dense expression in dorsal-posterior motor thalamus centered on the

145 ventrolateral nucleus (VL) with expression in anteromedial (AM), ventral posteromedial (VPM)

146 and ventral posterolateral (VPL) nuclei, but no staining in the ventromedial nucleus (VM),

147 which primarily receives input from the basal ganglia (BG) and fastigial nucleus (FN) (Figure

148 1a, Figures S1 and S2) (Kuramoto et al., 2009; Person et al., 1986; Sakai et al., 1996; Tanaka  
149 et al., 2018). Moreover, the vast majority of neurons in MTh<sub>DN/IPN</sub> sent direct projections to  
150 M1<sub>FL</sub> highlighting the high degree of connectivity between two important nodes along the  
151 cerebellar-thalamocortical pathway (mean = 76.0%, 95% CI [69.4, 82.8], n = 16 slices from N  
152 = 3 mice, Figure S3).

153  
154 To investigate whether MTh<sub>DN/IPN</sub> was necessary for cued goal-directed movement initiation,  
155 we focally injected a small bolus of the GABA<sub>A</sub> receptor agonist muscimol centered on the  
156 ventrolateral nucleus, with an estimated spread of ~500  $\mu$ m from the point of injection within  
157 10 minutes (Martin, 1991) (Figure 1g and Figure S4). By applying muscimol during behavioral  
158 task engagement, we recorded the immediate post-injection effects. Muscimol reduced task  
159 success by ~90%, 5-10 minutes after injection, an effect that persisted for the duration of the  
160 session before reverting to baseline after 24 hours (5-10 mins, mean = 0.11 normalized task  
161 success, 95% CI [0.04, 0.18, N = 5 mice,  $F(1,8) = 63.0$ ,  $P = 1.9 \times 10^{-4}$ , two-way ANOVA with  
162 Bonferroni-Holm correction for multiple comparisons) (Figure 1h). Reduced task success was  
163 not a result of task disengagement as cue presentation reproducibly evoked short-latency  
164 whisking and enhanced arousal (Video S2). Moreover, mice did not experience a loss of  
165 forelimb postural control, as evidenced by the accurate trial-to-trial forelimb positioning at cue  
166 presentation (Figures 1i and 1j, Figure S4). The predominant effect of MTh<sub>DN/IPN</sub> inactivation  
167 was not a slowing of reaction times (Meyer-Lohmann et al., 1977; Mink and Thach, 1991;  
168 Spidalieri et al., 1983; Thach, 1975; van Donkelaar et al., 2000), instead it selectively blocked  
169 movement initiation. Given that MTh<sub>DN/IPN</sub> provides feedforward excitation to M1<sub>FL</sub>, we next  
170 assessed whether motor cortical output was also necessary by focally injecting muscimol into  
171 the center of M1<sub>FL</sub> (Schiemann et al., 2015). M1<sub>FL</sub> inactivation reduced task success by ~70%,  
172 5-10 minutes after injection, persisting for the duration of the session before reverting to  
173 baseline after 24 hours (5-10 mins, mean = 0.29 normalized task success, 95% CI [0.11, 0.51],  
174 N = 5 mice,  $F(1,8) = 3.7$ ,  $P = 0.09$ , two-way ANOVA with Bonferroni-Holm correction for  
175 multiple comparisons). Dissimilar to motor thalamic inactivation, silencing M1<sub>FL</sub> output induced

176 a loss of forelimb postural control and hemiplegia, resulting in an inability to engage with the  
 177 lever and task (Figure S4 and Video S3). Together, these data suggest that M1 is essential  
 178 for coordinated motor control but MTh<sub>DN/IPN</sub> output is a prerequisite for goal-directed movement  
 179 initiation in mice.  
 180  
 181 To test whether MTh<sub>DN/IPN</sub> response timing was consistent with a role in movement initiation,  
 182 we employed Gradient Refractive Index (GRIN) lens-mediated 2-photon population calcium  
 183 imaging of MTh<sub>DN/IPN</sub> neurons during task engagement (Figures 2a and 2b). We found that the  
 184 majority of MTh<sub>DN/IPN</sub> neurons displayed task-related activity changes (192/248 neurons, 11  
 185 fields of view (FOV), N = 8 mice) either prior to movement initiation (early onset positive  $\Delta F/F_0$ ,  
 186 127/192 neurons; early onset negative  $\Delta F/F_0$ , 24/192 neurons) or during the post-movement  
 187 period (late onset positive  $\Delta F/F_0$ , 18/192 neurons; late onset negative  $\Delta F/F_0$ , 23/192 neurons)  
 188 (Figures 2c and 2d). The most prominent activity profile of early onset neurons – i.e. activity  
 189 that could contribute to movement initiation – was enhanced activity that occurred after the  
 190 cue but ~300 ms prior to movement initiation (early onset neurons – 84.1% enhanced, 15.9%  
 191 suppressed) (Figure 2d). This dominant population response profile was consistent across

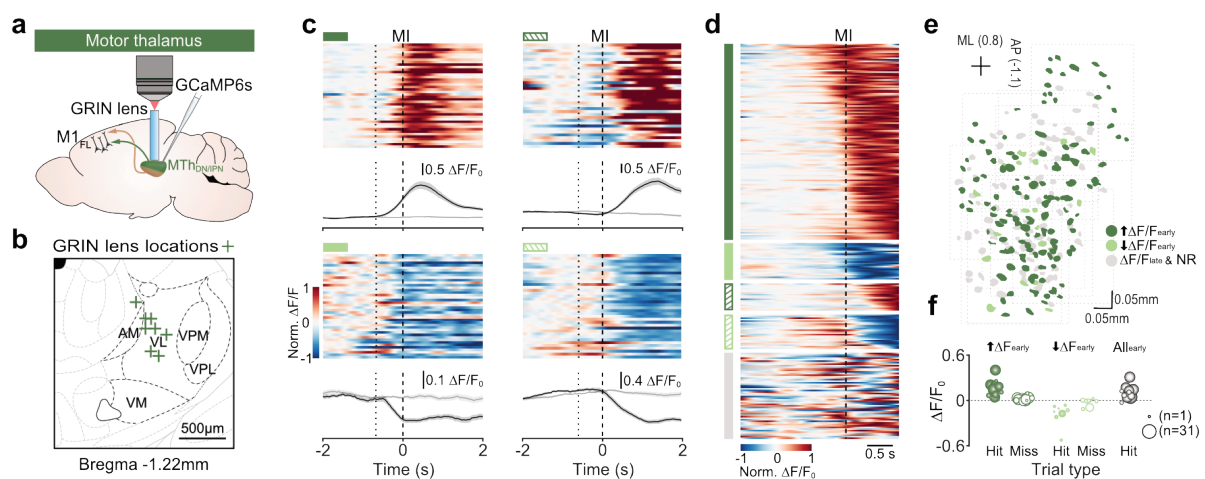

**Figure 2. Enhanced activity dominates trial-to-trial MTh<sub>DN/IPN</sub> population responses prior to movement initiation.**

(a) Gradient-index (GRIN) lens-mediated 2-photon population calcium imaging in MTh<sub>DN/IPN</sub>. M1<sub>FL</sub>, forelimb motor cortex; MTh<sub>DN/IPN</sub>, dentate / interpositus nucleus-recipient region of motor thalamus. (b) Anatomical locations of GRIN lens placements in MTh<sub>DN/IPN</sub> (N = 8 mice). Motor thalamic nuclei: AM, anteromedial; VL, ventrolateral; VPM, ventral posteromedial nucleus; VPL, ventral posteromedial; VM, ventromedial. (c) Four example MTh<sub>DN/IPN</sub> neurons: clockwise from top left, 'early onset enhanced' (dark green), 'late onset enhanced' (dark green hatching), 'late onset suppressed' (light green hatching), 'early onset suppressed' (light green). Top, raster showing normalised  $\Delta F/F_0$  across successive trials. Bottom,  $\Delta F/F_0$  mean  $\pm$  s.e.m. Black lines represent hit trials, grey lines represent miss trials. Dotted lines, median cue onset; dashed lines, movement initiation (MI). (d) Raster showing average  $\Delta F/F_0$  across trials for individual neurons. Neurons are classified and grouped into 'early onset enhanced' (dark green, n = 127/248 neurons); 'early onset suppressed' (light green, n = 24/248 neurons); 'late onset enhanced' (dark green hatching, n = 18/248 neurons); 'late onset suppressed' (light green hatching, n = 23/248 neurons); and 'non-responsive' (grey, n = 56/248 neurons). Neurons are ordered by  $\Delta F/F_0$  onset (n = 11 fields of view, N = 8 mice). (e) Spatial distribution of early onset enhanced (dark green), early onset suppressed (light green) and late onset/non-responsive neurons (grey) in MTh<sub>DN/IPN</sub>. Dashed boxes represent different fields of view. ML, medial-lateral; AP anterior-posterior. (f) Average  $\Delta F/F_0$  of early onset enhanced (dark green), early onset suppressed (light green) or all early onset (grey) neurons during hit (filled symbols) and miss trials (open symbols) separated by FOV. Circle size represents number of neurons per field of view [range 1 – 31].

192

193 trials and was not spatially restricted to a defined region of MTh<sub>DN/IPN</sub> (Figures 2c-2e). To  
 194 investigate whether MTh<sub>DN/IPN</sub> population responses conveyed information regarding the cue  
 195 or a purely movement-related signal, we exploited miss trials where mice perceived the cue,  
 196 as indicated by short-latency whisking and increased arousal, but did not engage in the task  
 197 (see Video S1). In the absence of movement, no appreciable cue-evoked responses across  
 198 early onset neurons were observed (Figures 2c and 2f), suggesting MTh<sub>DN/IPN</sub> output conveys  
 199 a purely motor-related feedforward signal.

200  
 201 We next tested which of our MTh<sub>DN/IPN</sub> population response models best described the trial-to-  
 202 trial activity in early onset enhanced neurons (see Figure 1b). Clustering trials by short,  
 203 medium and long reaction times (RTs) and aligning averaged trial-to-trial population  $\Delta F/F_0$   
 204 traces to movement initiation, MTh<sub>DN/IPN</sub> responses displayed a consistent, sharp increase in  
 205  $\Delta F/F_0 \sim 300$  ms prior to movement initiation, irrespective of reaction time (short RT, mean onset  
 206 = 308 ms, 95% CI [248, 377]; medium RT, mean onset = 299 ms, 95% CI [205, 392]; long RT,  
 207 mean onset = 351 ms, 95% CI [251, 455], 117 neurons, 9 fields of view (FOV), N = 7 mice, for

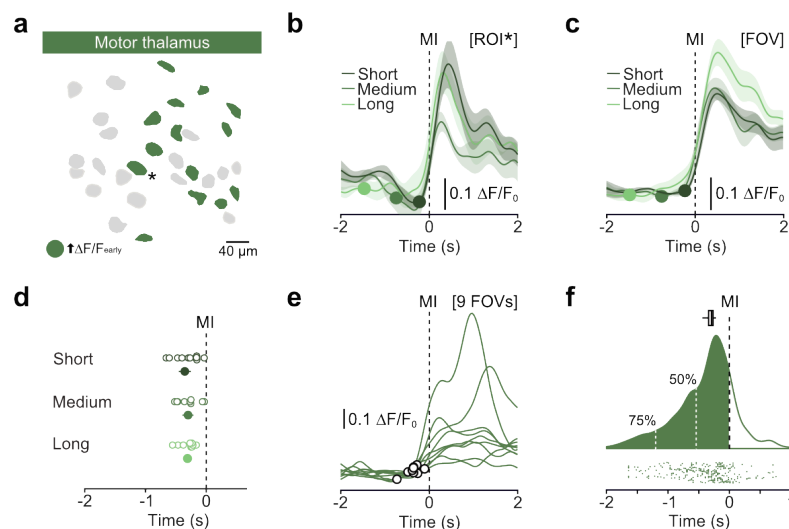

**Figure 3. MTh<sub>DN/IPN</sub> population responses provide a reliable trial-to-trial movement initiation signal.**

(a) Spatial distribution of early onset enhanced neurons in a representative field of view in MTh<sub>DN/IPN</sub>. (b-c) Average  $\Delta F/F_0$  from (b) a single early onset enhanced neuron depicted in panel (a) by a \*, or (c) all early onset enhanced neurons in the field of view shown in panel (a), aligned to movement initiation (MI) and split by short, medium and long reaction time trials. Colored circles depict median time of cue presentation. [ROI], region of interest; [FOV], field of view. Mean  $\pm$  s.e.m. (d) Motor thalamic population response trajectory onsets split by short, medium and long reaction times. Open circles represent individual fields of view, filled circles represent means  $\pm$  95% CI (n = 9 fields of view, N = 7 mice). Dashed line depicts movement initiation (MI). (e) Average  $\Delta F/F_0$  trajectories from nine early onset enhanced neurons from different fields of view (FOVs) with response onsets indicated by black circles. Dashed line depicts movement initiation (MI). (f) Raincloud plot showing the distribution of bootstrapped trial-to-trial motor thalamic response onsets for all early onset enhanced neurons across nine fields of view. *Top*, box-and-whisker plot of the median onset bootstrapped estimate. *Middle*, average kernel density estimation of trial-to-trial motor thalamic response onsets with 50% and 75% AUC to movement initiation (MI) depicted by white vertical dashed lines. *Bottom*, raster of trial-to-trial early enhanced population onset times across all trials (n = 297 trials, n = 9 fields of view, N = 7 mice).

208



209 inclusion criteria see Methods) (Figures 3a-3d). Moreover, trial-to-trial consistency in  
210 MTh<sub>DN/IPN</sub> output provided a reliable indication of when movement was likely to be initiated  
211 (Figures 3e and 3f). Thus, our results are consistent with a model whereby MTh<sub>DN/IPN</sub> output  
212 provides a reliable time-locked motor signal immediately prior to movement initiation that is  
213 temporally uncoupled from the sensory cue (i.e. model (i) in Figure 1b).

214  
215 To gain a mechanistic insight into how feedforward input from MTh<sub>DN/IPN</sub> shapes motor cortical  
216 membrane potential dynamics, we performed whole-cell patch-clamp recordings from  
217 identified L5B projection neurons in M1<sub>FL</sub> (Figure 4a). When aligned to movement initiation,  
218 L5B neurons displayed a continuum of subthreshold membrane potential changes, biased  
219 towards depolarizing  $V_m$  (depolarizing,  $n = 15/23$  neurons; hyperpolarizing,  $n = 4/23$  neurons,  
220 non-responsive,  $n = 4/23$ ,  $N = 23$  mice), with the direction of the  $\Delta V_m$  being consistent from  
221 trial-to-trial (Figures 4b-4f and Figure S5). Importantly, peak-scaled  $V_m$  traces – whether  
222 depolarizing or hyperpolarizing – displayed stereotyped trajectories where the  $\Delta V_m$  onset  
223 closely matched the distribution of MTh<sub>DN/IPN</sub> population response onsets (i.e. ~300ms prior to  
224 movement initiation, Figures 4g-4i). To investigate whether L5B  $V_m$  dynamics are driven  
225 entirely by input from motor thalamus, we again exploited miss trials in which thalamic  
226 population responses are absent (see Figures 2c and 2f).  $V_m$  trajectories were on average  
227 smaller in amplitude and duration (mean miss:hit AUC ratio = 0.65, 95% CI [0.50, 0.80]),  
228 suggesting that convergence of thalamic and other long-range inputs is necessary for cued  
229 goal-directed movement initiation (Figure 4j and Figure S5). To drive movement, subthreshold  
230  $V_m$  changes must transform into behaviorally-relevant spiking. Accordingly, we found a strong  
231 correlation between changes in  $V_m$  and firing rate across layer 5B projection neurons, including  
232 pyramidal tract (PT-type) neurons that have direct access to brainstem and spinal cord circuits  
233 controlling voluntary movement (Figures 4k-4m and Figure S5). Next, we focally injected a  
234 small bolus of muscimol centered on the ventrolateral nucleus while recording from identified  
235 L5B projection neurons (Figure 4n) to explore a causal link between thalamic input, L5B  $V_m$

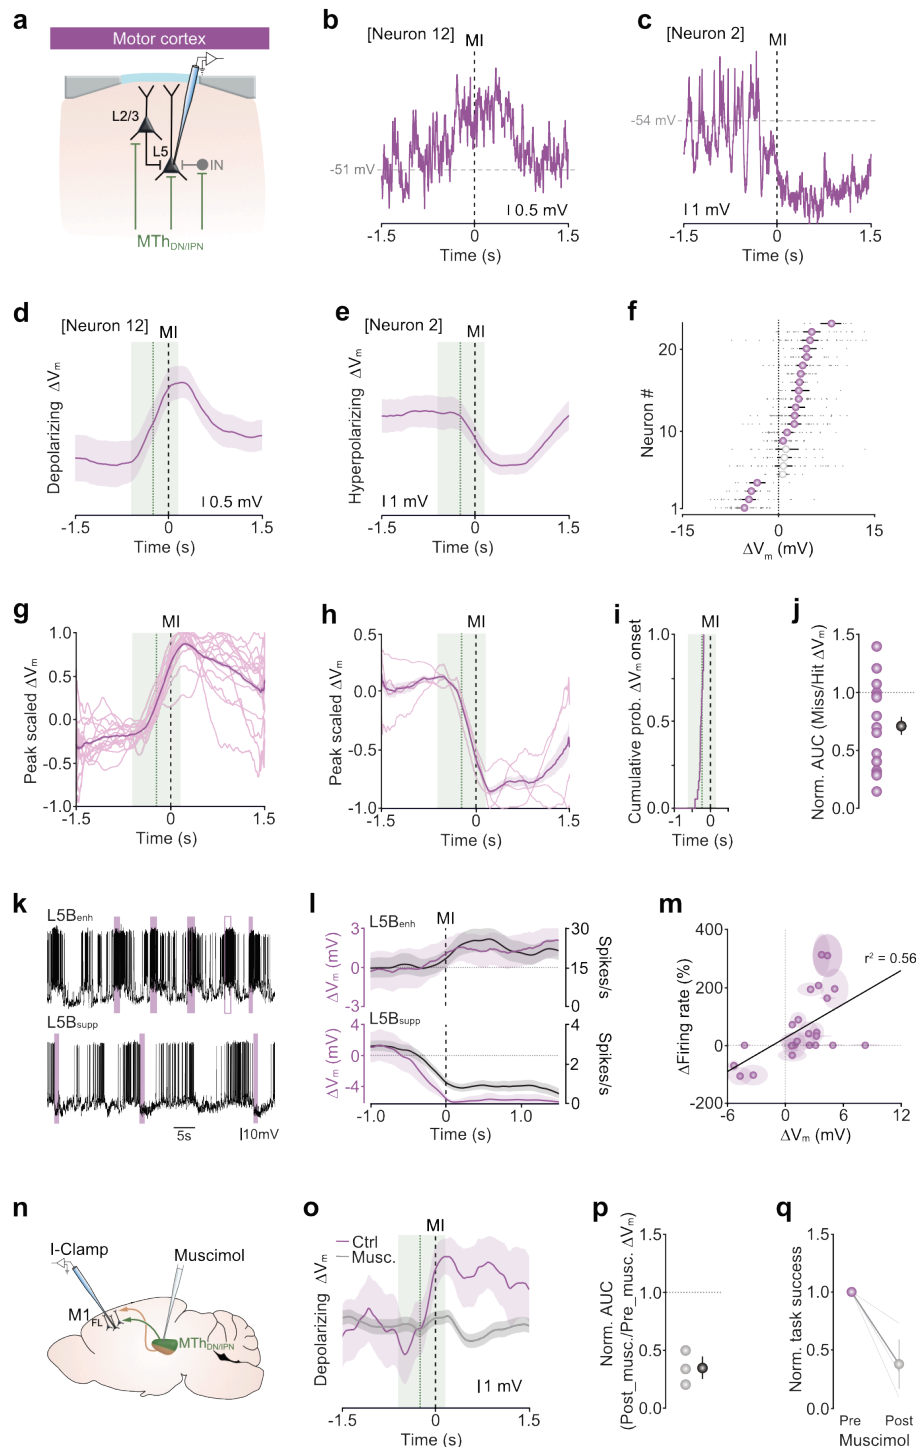

**Figure 4. Feedforward MTH<sub>DNIPN</sub> input is necessary for bidirectional M1<sub>FL</sub> L5B output modulation and cued goal-directed movement initiation.**

(a) Patch-clamp recording from L5B projection neurons in M1<sub>FL</sub>-IN, interneuron; MTH<sub>DNIPN</sub>, dentate / interpositus nucleus-recipient region of motor thalamus. (b-c) Representative single trial subthreshold membrane potential ( $V_m$ ) trajectories from two L5B projection neurons showing either a depolarization (b) or hyperpolarization (c) prior to movement initiation (MI). Spikes have been clipped to improve visualisation of the subthreshold  $V_m$ . (d-e) Average changes in subthreshold  $V_m \pm 95\%$  CI in the two L5B projection neurons depicted in (b) and (c). In these and subsequent figure panels, the green dashed line depicts mean MTH<sub>DNIPN</sub> activity onset  $\pm 95\%$  CI as shown in Fig. 3d and the black dashed line represents movement initiation (MI). (f) Average L5B projection neuron perimovement  $\Delta V_m \pm 95\%$  CI. Grey dots represent individual trials, purple symbols represent significant  $\Delta V_m$  changes, white symbols represent non-significant changes, defined by comparing 95% bootstrapped confidence intervals ( $n = 23$  neurons,  $N = 23$  mice). (g-h) Peak scaled mean subthreshold  $V_m$  from individual neurons overlaid and split by direction of change (g, depolarizing,  $n = 15/23$  neurons; h, hyperpolarizing,  $n = 4/23$  neurons). Thick purple line represents population means  $\pm 95\%$  CI. (i) Cumulative probability of  $\Delta V_m$  onsets across all significantly modulated L5B projection neurons ( $n = 19/23$  neurons). MI, movement initiation. (j) Ratio of normalised area under the curve for  $V_m$  trajectories during miss versus hit trials. Purple symbols represent data from individual neurons, black symbols represent population mean  $\pm 95\%$  CI. (k) Representative  $V_m$  traces from a L5B depolarizing (top) and L5B hyperpolarizing (bottom) neuron across multiple trials. Filled purple bars depict hit trials, open purple bars depict miss trials. For clarity, internally generated movements (IGMs) are not shown. (l) Average subthreshold  $\Delta V_m \pm 95\%$  CI (purple) and firing rate (FR, black) trajectories for the L5B enhanced and L5B suppressed neurons shown in (k) aligned to movement initiation (MI). Thick lines represent the mean  $\pm 95\%$  CI. (m) Correlation between movement-related subthreshold  $\Delta V_m$  and firing rate changes. Colored symbols represent mean  $\pm 95\%$  CI from individual neurons, black line is a linear fit to the data (Pearson's  $r$ ). (n) Patch-clamp recording from M1<sub>FL</sub> L5B projection neurons during muscimol inactivation targeted to MTH<sub>DNIPN</sub>. I-Clamp, current clamp; M1<sub>FL</sub>, forelimb motor cortex. (o) Average subthreshold  $\Delta V_m \pm 95\%$  CI from a L5B projection neuron before (Ctrl, purple) and after muscimol inactivation (Musc., black) targeted to MTH<sub>DNIPN</sub>. (p) Ratio of normalised area under the curve for  $V_m$  trajectories post (Post\_musc.) versus pre (Pre\_musc.) muscimol injection. Grey symbols represent data from individual neurons, black symbol represents population mean  $\pm 95\%$  CI. (q) Normalised task success before (purple symbol) and after (grey symbol) muscimol injection targeted to MTH<sub>DNIPN</sub>. Colored symbols represent mean  $\pm 95\%$  CI, grey lines indicate data from individual neurons.

237 trajectories and movement initiation. Muscimol inactivation reduced the amplitude and  
238 duration of L5B  $V_m$  responses (mean muscimol:control AUC ratio = 0.35, 95% CI [0.26, 0.44],  
239  $n = 3$  neurons from  $N = 3$  mice), mirroring  $V_m$  trajectories during miss trials where  $MTh_{DN/IPN}$   
240 input is absent (compare Figure 4j and Figure 4p; and Figure 4o and Figure S5h), and reduced  
241 task success (mean = 0.37 normalized task success, 95% CI [0.16, 0.59],  $n = 3$  neurons,  $N$   
242 = 3 mice) (Figure 4q). Thus,  $MTh_{DN/IPN}$  input to  $M1_{FL}$  drives activity dynamics necessary for  
243 goal-directed movement initiation.

244  
245 If prior to movement, mice remain in a prepared state awaiting an 'initiation' signal, direct  
246 stimulation of the  $MTh_{DN/IPN}$  thalamocortical pathway in the absence of the cue could provide  
247 an input sufficient to evoke learned movements. We tested this prediction using a dual  
248 optogenetic stimulation strategy employing either direct stimulation of  $MTh_{DN/IPN}$  neurons or  
249 thalamocortical axon terminals in  $M1_{FL}$  during the baseline period prior to cue presentation  
250 (Figure 5a). By targeting small volumes of AAV2/1-CAG-ChR2 virus to the dorsal-posterior  
251 motor thalamus, we restricted opsin expression almost exclusively to neurons in  $MTh_{DN/IPN}$   
252 (Figure S6). Direct stimulation of  $MTh_{DN/IPN}$  or axon terminals in  $M1_{FL}$  evoked forelimb  
253 movements in 9/10 mice, with full lever pushes occurring in ~26% of trials ( $MTh_{DN/IPN}$   
254 stimulation, mean = 0.27 proportion of trials with full lever push, 95% CI [0.23, 0.30],  $N = 9/10$   
255 mice; axon terminal stimulation, mean = 0.25 proportion of trials with full lever push, 95% CI  
256 [0.13, 0.38],  $N = 6/6$  mice, Video S4). The duration and reaction times of photostimulated push  
257 movements were comparable to cue-evoked trials (Figures 5b-5d). In a small proportion of  
258 trials, light stimulation evoked partial lever pushes that did not reach the reward zone  
259 ( $MTh_{DN/IPN}$  stimulation, mean = 0.15 proportion of trials, 95% CI [0.09, 0.20],  $N = 9$  mice; axon  
260 terminal stimulation, mean = 0.06 proportion of trials, 95% CI [0, 0.14],  $N = 6$  mice) (Figure  
261 5b). Stimulating either pathway in the absence of ChR2 expression did not evoke any  
262 detectable forelimb movements ( $N = 2$ ) (Figure S6). To compare the cellular effects of cue-  
263 versus ChR2-evoked  $MTh_{DN/IPN}$  input in  $M1_{FL}$ , we performed whole-cell recordings from  
264 identified  $M1_{FL}$  L5B projection neurons during interleaved cue and  $MTh_{DN/IPN}$  photostimulation

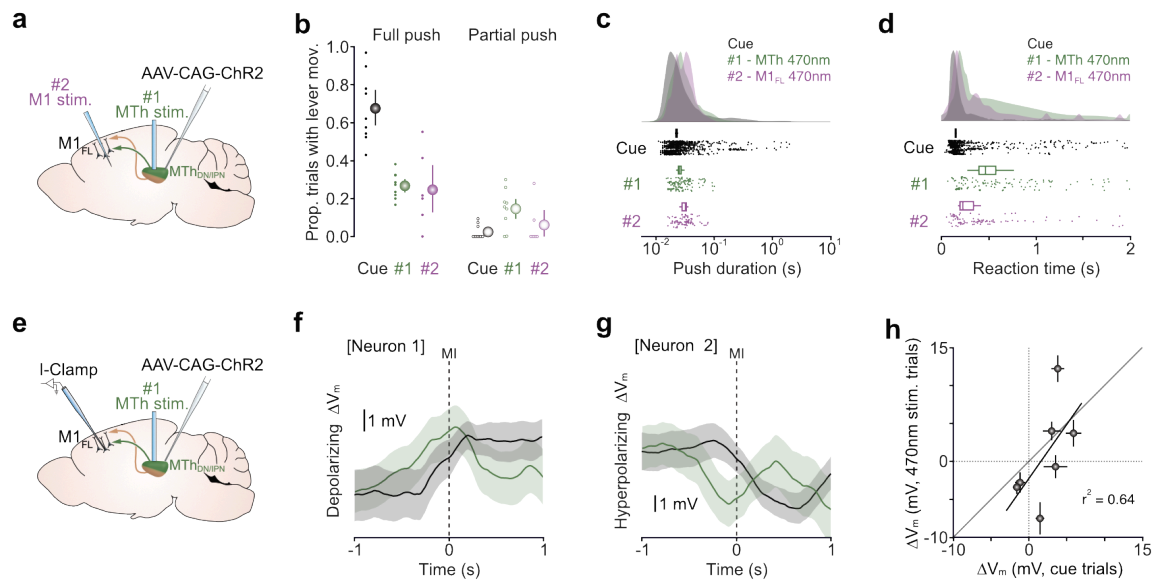

**Figure 5. Optogenetic stimulation of MTh<sub>DN/IPN</sub> axon terminals recapitulates cued goal-directed movement.**

(a) Dual MTh optogenetic stimulation strategy: Channelrhodopsin 2 (ChR2) expression was targeted to neurons in MTh<sub>DN/IPN</sub> and stimulated via an optic fiber placed directly above (#1) or via a tapered optic fiber implanted directly into forelimb motor cortex (M1<sub>FL</sub>) (#2). (b) Comparison of cue-evoked and ChR2-evoked task engagement represented as the proportion of trials with either full (left) or partial (right) lever push movements. Black, cue-evoked; green, direct MTh<sub>DN/IPN</sub> stimulation; purple, stimulation of MTh<sub>DN/IPN</sub> axon terminals in M1<sub>FL</sub>. Colored dots represent data from individual mice, colored symbols represent mean  $\pm$  95% CI. For Cue, #1 and #2, N = 9, 9 and 6 mice, respectively. (c-d) Raincloud plots showing the distributions of push durations (c) and reaction times (d) of cue-evoked (black) and ChR2-evoked (#1, green and #2, purple) hit trials. Box-and-whisker plots of bootstrapped estimates of median statistics. (e) Patch-clamp recording from M1<sub>FL</sub> L5B projection neurons during ChR2-mediated stimulation of MTh<sub>DN/IPN</sub> neurons. I-Clamp, current clamp; M1<sub>FL</sub>, forelimb motor cortex. (f-g) Average changes in subthreshold  $V_m \pm$  95% CI in two L5B projection neurons showing either a pre-movement depolarization (f) or hyperpolarization (g) in response to an auditory cue (black) or ChR2-mediated stimulation of MTh<sub>DN/IPN</sub> neurons (green). Dashed line represents movement initiation. (h) Correlation between pre-movement cue-evoked and ChR2-evoked subthreshold  $\Delta V_m$  across L5B projection neurons (n = 7 neurons, N = 6 mice). Filled symbols represent mean  $\pm$  95% CI, black line is a linear fit to the data (Pearson's  $r$ ).

265  
266 trials (Figure 5e). Remarkably, during photostimulation trials, full push movements were  
267 associated with depolarizing or hyperpolarizing  $V_m$  changes that matched cue-evoked  $V_m$   
268 changes in the same neuron (Figures 5f-5h). Thus, selective recruitment of the MTh<sub>DN/IPN</sub> –  
269 M1<sub>FL</sub> thalamocortical pathway can recapitulate M1<sub>FL</sub> L5B neural activity dynamics required for  
270 goal-directed movement initiation.

271  
272 If behavioral context provides information necessary for learned movement initiation, ChR2-  
273 evoked forelimb lever push movements should be abolished during direct MTh<sub>DN/IPN</sub>  
274 stimulation in an altered behavioral context. To test this prediction, we placed trained mice on  
275 a flat baseplate in the absence of any support / movable levers, reward spout or water rewards,  
276 and compared cue-evoked forelimb movements in both the learned and altered behavioral  
277 contexts. Habituation in the altered behavioral context was performed within training session  
278 to ensure that the cued lever push behavior was not extinguished. As expected, trained mice  
279 generated cue-evoked forelimb lever push trajectories in 63% of trials in the learned behavioral  
280 context (LBC) but in the altered behavioral context (ABC) cue-evoked push-like movements

281 were absent (LBC, mean = 0.63 proportion of trials, 95% CI [0.55, 0.71]; ABC, mean = 0.02  
 282 proportion of trials, 95% CI [0.00, 0.04], N = 3 mice), confirming that mice acknowledged the  
 283 difference between the two behavioral environments (Figures 6a-6e, Video S5). We then  
 284 replicated the experiment by replacing the auditory cue with direct photostimulation of  
 285 MTh<sub>DN/IPN</sub> during the baseline period (Figure 6f). If direct MTh<sub>DN/IPN</sub> stimulation alone drives  
 286 specific muscle synergies, then Chr2-evoked forelimb movement trajectories will be  
 287 unaffected by a change in context. However, we found that in the learned behavioral context,  
 288 direct MTh<sub>DN/IPN</sub> stimulation evoked forelimb movements in 67% of trials with 45% of trials  
 289 containing successful lever push trajectories (mean = 0.67 proportion of trials with movement,  
 290 95% CI [0.52, 0.82]; mean = 0.45 proportion of trials with push action, 95% CI [0.40, 0.49], N  
 291 = 3 mice) (Figures 6g and 6i, Video S6). While in the altered behavioral context, direct  
 292 MTh<sub>DN/IPN</sub> stimulation evoked forelimb movements in 64% of trials but only 4% contained push-  
 293 like movements (mean = 0.64 proportion of trials with movement, 95% CI [0.59, 0.69]; mean  
 294 = 0.04 proportion of trials with push action, 95% CI [0.02, 0.07], N = 3 mice) (Figures 6h and  
 295 6j, Video S6). Taken together, these results demonstrate that the MTh<sub>DN/IPN</sub> thalamocortical

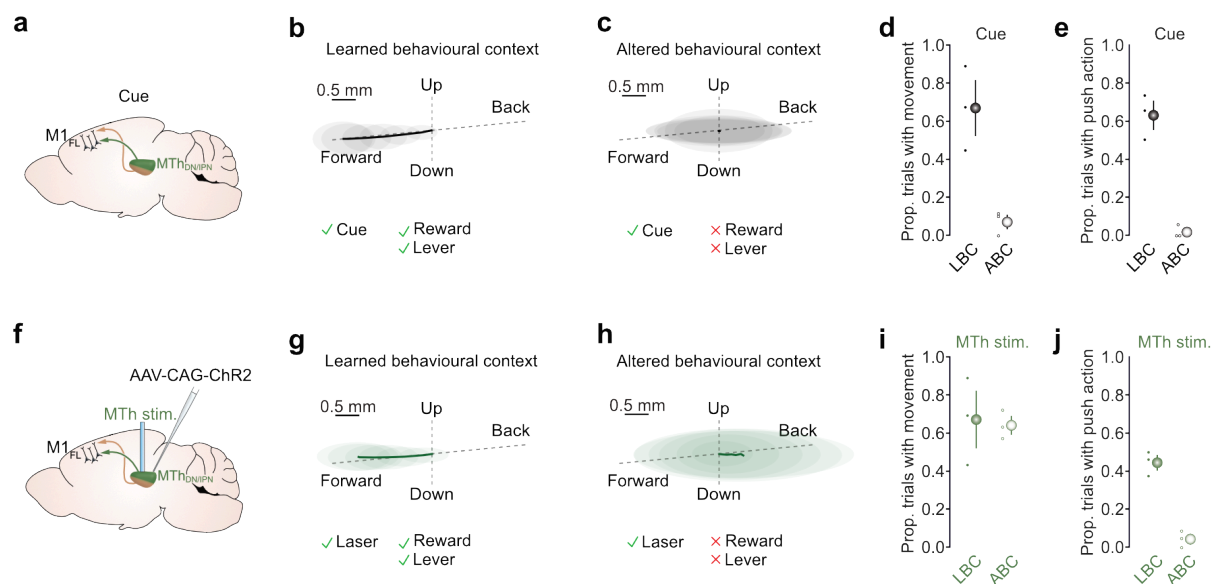

**Figure 6. MTh<sub>DN/IPN</sub> stimulation evokes behavioral context-specific movement initiation.**

(a) Mouse sagittal brain schematic depicting cue-evoked feedforward input from MTh<sub>DN/IPN</sub> to M1<sub>FL</sub>. (b-c) Average cue-evoked kinematic forepaw trajectories from an example mouse in a learned behavioral context (i.e. auditory cue, reward spout & movable lever (b)) or altered behavioral context (i.e. auditory cue, no reward spout & no movable lever (c)). Thick black line depicts average trajectory overlaid with the 95% CI of frame-by-frame paw position variance. (d-e) Proportion of trials with cue-evoked forelimb movement (d) or forelimb push actions (e) in a learned behavioral context (LBC) versus altered behavioral context (ABC). Colored dots represent data from individual mice, colored symbols represent mean  $\pm$  95% CI (N = 3 mice). (f) MTh<sub>DN/IPN</sub> optogenetic stimulation strategy: ChR2 expression was targeted to neurons in MTh<sub>DN/IPN</sub> and stimulated via an optic fiber placed directly above. (g-h) Average ChR2-evoked kinematic forepaw trajectories from an example mouse in a learned behavioral context (g) or altered behavioral context (h). Thick green lines depict average trajectory overlaid with the 95% CI of frame-by-frame paw position variance. (i-j) Proportion of trials with ChR2-evoked forelimb movement (i) or forelimb push actions (j) in a learned behavioral context (LBC) versus altered behavioral context (ABC). Colored dots represent data from individual mice, colored symbols represent mean  $\pm$  95% CI.

296

297 pathway conveys a robust motor timing signal necessary for initiating behavioral context-  
298 specific movement initiation.

299

## 300 **Discussion**

301 Here, we investigated the contribution of the cerebellar-recipient motor thalamocortical  
302 pathway to movement initiation, showing that a robust and reproducible feedforward motor  
303 timing signal propagating from  $MTh_{DN/IPN}$  to  $M1_{FL}$  is essential for goal-directed movement  
304 initiation. Specifically, we show that trial-to-trial  $MTh_{DN/IPN}$  population responses are dominated  
305 by a time-locked increase in activity immediately prior to movement initiation that is temporally  
306 uncoupled from cue presentation, providing a fixed latency feedforward motor timing signal to  
307  $M1_{FL}$ .  $MTh_{DN/IPN}$  thalamocortical input is a prerequisite for generating  $M1_{FL}$  layer 5B activity  
308 dynamics necessary for movement initiation and blocking  $MTh_{DN/IPN}$  output suppresses task  
309 engagement. Finally, direct stimulation of  $MTh_{DN/IPN}$ , or their axon terminals in  $M1_{FL}$ , in the  
310 absence of the cue recapitulated motor cortical activity dynamics and forelimb behavior in the  
311 learned behavioral context, but generated semi-random movements in an altered behavioral  
312 context where the lever and reward were absent. Together, these data suggest that dentate  
313 and interpositus nucleus-recipient motor thalamocortical pathway plays a pivotal role in  
314 directly gating movement initiation, thus confirming and extending existing theories of the role  
315 of the cerebellar-thalamocortical pathway in initiating goal-directed movement.

316

317 By employing population calcium imaging of  $MTh_{DN/IPN}$  activity we demonstrate that trial-to-trial  
318 output from the dentate and interpositus nucleus-recipient regions of motor thalamus do not  
319 reflect sensorimotor transformations from cue to movement initiation, instead we suggest that  
320  $MTh_{DN/IPN}$  output reflects a pure feedforward motor timing signal that indicates the immediate  
321 intention to move. In the absence of this input, i.e. local inactivation of  $MTh_{DN/IPN}$ , the command  
322 to move is blocked resulting in a suppression of goal-directed movement initiation. If the  
323 cerebellar-recipient motor thalamocortical pathway conveys a pure motor timing signal, where  
324 in the brain is the delay between cue and  $MTh_{DN/IPN}$  activity onset generated? A signal that

325 directly gates movement likely overlaps with preparatory activity in frontal motor regions  
326 (Churchland et al., 2006b; Li et al., 2015; Requin et al., 1990) irrespective of how movements  
327 are initiated (Lara et al., 2018). Preparatory activity both in frontal motor regions and deep  
328 cerebellar nuclei are driven by a cortico-cerebellar loop through the motor thalamus, where  
329 persistent neural dynamics across brain regions facilitates movement choice and execution.  
330 Thus, sensory-driven persistent activity in frontal motor-associated regions could provide the  
331 initial ‘decision to move’, which propagates through cortico-cerebellar loops to form a discrete  
332 motor timing signal at the level of motor thalamus (Chabrol et al., 2019; Churchland et al.,  
333 2006a; Gao et al., 2018; Guo et al., 2014). Although our data do not shed light on the origin  
334 of the signal, we demonstrate that  $MTh_{DN/IPN}$  is an essential node in the cerebello-cortical loop  
335 through which motor timing signals propagate to initiate goal-directed movement. Further  
336 studies will be required to determine the contribution of cortico-ponto-cerebellar and  
337 cerebellar-thalamocortical loops to sensorimotor transformations across a range of goal-  
338 directed motor tasks, and whether information pertaining to movement preparation and  
339 execution propagate through the same or parallel subdivisions of the motor thalamus (Chabrol  
340 et al., 2019; Gao et al., 2018; Kuramoto et al., 2009; Miller and Brooks, 1982).

341  
342 The behavioral context-dependence of photoactivated movements suggests that  $MTh_{DN/IPN}$   
343 likely conveys a movement-invariant motor initiation signal that converges, at the level of motor  
344 cortex, with other long-range inputs necessary for selecting movement type. Consistent with  
345 this notion, in the absence of feedforward  $MTh_{DN/IPN}$  input (i.e. during miss trials or thalamic  
346 inactivation), M1 layer 5 projection neurons displayed reduced task-related activity that did not  
347 initiate movement. The origin of the convergent long-range input(s) remains unknown, but  
348 likely candidates are cortico-cortical interactions between orbitofrontal cortex or frontal motor  
349 areas and M1 (Hooks et al., 2013; Reep et al., 1990), thought to accumulate task-relevant  
350 information required for motor planning and decision-making (Gao et al., 2018; Li et al., 2015),  
351 or basal ganglia-thalamocortical interactions that determine the type, timing and invigoration

352 of upcoming movements (Dudman and Krakauer, 2016; Inase et al., 1996; Klaus et al., 2019;  
353 Thura and Cisek, 2017; Williams and Herberg, 1987).

354

355 Directly activating the  $MTh_{DN/IPN}$  thalamocortical pathway in the altered behavioral context  
356 consistently generated semi-random forelimb movements (Tanaka et al., 2018), whereas full  
357 recapitulation of the learned behavior could only be achieved in the learned behavioral context.  
358 If convergent input from  $MTh_{DN/IPN}$  and other task-related brain areas is necessary for learned  
359 movement initiation, why can photostimulation of the thalamocortical pathway result in learned  
360 movement initiation in the absence of an external sensory cue? Previous studies have shown  
361 that behavioral context is an important determinant of neural trajectories during goal-directed  
362 motor tasks (Russo et al., 2018; Suresh, 2019), where cortical dynamics evolve in a pre-  
363 determined manner depending on their initial state (Churchland et al., 2010; Kaufman et al.,  
364 2014; Sauerbrei, 2018). In the learned behavioral context, M1 population dynamics likely  
365 remain in a quasi-prepared state, awaiting external input to initiate learned forelimb movement.  
366 Thus, in some trials (up to 40%) direct  $MTh_{DN/IPN}$  stimulation is likely sufficient to drive M1  
367 neural trajectories towards a state required for learned movement initiation. Conversely, in  
368 mice habituated to an unrewarded, altered behavioral context, M1 population dynamics driven  
369 by direct  $MTh_{DN/IPN}$  stimulation likely evolve from a different initial state resulting in neural  
370 trajectories that generate arbitrary, but not goal-directed, forelimb movements (Graziano et  
371 al., 2002; Rispal-Adel et al., 1982; Tanaka et al., 2018). A central question for future  
372 investigation is how thalamic input and behavioral context contribute to motor cortical  
373 population dynamics across learning and different motor behaviors.

374

375 In summary, our findings extend our understanding of how specific subdivisions of the  
376 mammalian motor thalamus contribute to motor timing (Dormont et al., 1982; Kurata, 2005;  
377 Strick, 1976), suggesting that the cerebellar-thalamocortical pathway plays a critical role in the  
378 initiation of goal-directed movement.

379



## 380 **References**

381 Bastian, A.J., and Thach, W.T. (1995). Cerebellar outflow lesions: a comparison of movement  
382 deficits resulting from lesions at the levels of the cerebellum and thalamus. *Ann. Neurol.* 38,  
383 881-892.

384  
385 Bosch-Bouju, C., Smither, R.A., Hyland, B.I., and Parr-Brownlie, L.C. (2014). Reduced reach-  
386 related modulation of motor thalamus neural activity in a rat model of Parkinson's disease. *J.*  
387 *Neurosci.* 34, 15836-15850.

388  
389 Butler, E.G., Horne, M.K., and Hawkins, N.J. (1992). The activity of monkey thalamic and  
390 motor cortical neurones in a skilled, ballistic movement. *J. Physiol.* 445, 25-48.

391  
392 Chabrol, F.P., Blot, A., and Mrcsic-Flogel, T.D. (2019). Cerebellar Contribution to Preparatory  
393 Activity in Motor Neocortex. *Neuron* 103, 506-519 e504.

394  
395 Churchland, M.M., Cunningham, J.P., Kaufman, M.T., Ryu, S.I., and Shenoy, K.V. (2010).  
396 Cortical preparatory activity: representation of movement or first cog in a dynamical machine?  
397 *Neuron* 68, 387-400.

398  
399 Churchland, M.M., Santhanam, G., and Shenoy, K.V. (2006a). Preparatory activity in premotor  
400 and motor cortex reflects the speed of the upcoming reach. *J. Neurophysiol.* 96, 3130-3146.

401  
402 Churchland, M.M., Yu, B.M., Ryu, S.I., Santhanam, G., and Shenoy, K.V. (2006b). Neural  
403 variability in premotor cortex provides a signature of motor preparation. *J. Neurosci.* 26, 3697-  
404 3712.

405  
406 Dormont, J.F., Schmied, A., and Conde, H. (1982). Motor command in the ventrolateral  
407 thalamic nucleus: neuronal variability can be overcome by ensemble average. *Exp. Brain Res.*  
408 48, 315-322.

409  
410 Dudman, J.T., and Krakauer, J.W. (2016). The basal ganglia: from motor commands to the  
411 control of vigor. *Current opinion in neurobiology* 37, 158-166.

412  
413 Fortier, P.A., Kalaska, J.F., and Smith, A.M. (1989). Cerebellar neuronal activity related to  
414 whole-arm reaching movements in the monkey. *J. Neurophysiol.* 62, 198-211.  
415  
416 Gao, Z., Davis, C., Thomas, A.M., Economo, M.N., Abrego, A.M., Svoboda, K., De Zeeuw,  
417 C.I., and Li, N. (2018). A cortico-cerebellar loop for motor planning. *Nature* 563, 113-116.  
418  
419 Gibson, A.R., Houk, J.C., and Kohlerman, N.J. (1985). Magnocellular red nucleus activity  
420 during different types of limb movement in the macaque monkey. *J. Physiol.* 358, 527-549.  
421  
422 Graziano, M.S., Taylor, C.S., and Moore, T. (2002). Complex movements evoked by  
423 microstimulation of precentral cortex. *Neuron* 34, 841-851.  
424  
425 Guo, Z.V., Li, N., Huber, D., Ophir, E., Gutnisky, D., Ting, J.T., Feng, G., and Svoboda, K.  
426 (2014). Flow of cortical activity underlying a tactile decision in mice. *Neuron* 81, 179-194.  
427  
428 Harvey, R.J., Porter, R., and Rawson, J.A. (1979). Discharges of intracerebellar nuclear cells  
429 in monkeys. *J. Physiol.* 297, 559-580.  
430  
431 Holmes, G. (1939). The cerebellum of man. *Brain* 62, 1-30.  
432  
433 Hooks, B.M., Mao, T., Gutnisky, D.A., Yamawaki, N., Svoboda, K., and Shepherd, G.M.  
434 (2013). Organization of cortical and thalamic input to pyramidal neurons in mouse motor  
435 cortex. *J. Neurosci.* 33, 748-760.  
436  
437 Horne, M.K., and Butler, E.G. (1995). The role of the cerebello-thalamo-cortical pathway in  
438 skilled movement. *Prog. Neurobiol.* 46, 199-213.  
439  
440 Inase, M., Buford, J.A., and Anderson, M.E. (1996). Changes in the control of arm position,  
441 movement, and thalamic discharge during local inactivation in the globus pallidus of the  
442 monkey. *J. Neurophysiol.* 75, 1087-1104.  
443  
444 Ivry, R.B., and Keele, S.W. (1989). Timing functions of the cerebellum. *J. Cog. Neuro.* 1, 136-  
445 152.

- 446  
447 Kaufman, M.T., Churchland, M.M., Ryu, S.I., and Shenoy, K.V. (2014). Cortical activity in the  
448 null space: permitting preparation without movement. *Nat. Neurosci.* 17, 440-448.
- 449  
450 Klaus, A., Alves da Silva, J., and Costa, R.M. (2019). What, If, and When to Move: Basal  
451 Ganglia Circuits and Self-Paced Action Initiation. *Annu. Rev. Neurosci.* 42, 459-483.
- 452  
453 Kuramoto, E., Furuta, T., Nakamura, K.C., Unzai, T., Hioki, H., and Kaneko, T. (2009). Two  
454 types of thalamocortical projections from the motor thalamic nuclei of the rat: a single neuron-  
455 tracing study using viral vectors. *Cereb. Cortex.* 19, 2065-2077.
- 456  
457 Kurata, K. (2005). Activity properties and location of neurons in the motor thalamus that project  
458 to the cortical motor areas in monkeys. *J. Neurophysiol.* 94, 550-566.
- 459  
460 Lara, A.H., Elsayed, G.F., Zimnik, A.J., Cunningham, J.P., and Churchland, M.M. (2018).  
461 Conservation of preparatory neural events in monkey motor cortex regardless of how  
462 movement is initiated. *eLife* 7.
- 463  
464 Li, N., Chen, T.W., Guo, Z.V., Gerfen, C.R., and Svoboda, K. (2015). A motor cortex circuit for  
465 motor planning and movement. *Nature* 519, 51-56.
- 466  
467 Meyer-Lohmann, J., Hore, J., and Brooks, V.B. (1977). Cerebellar participation in generation  
468 of prompt arm movements. *J. Neurophysiol.* 40, 1038-1050.
- 469  
470 Milak, M.S., Shimansky, Y., Bracha, V., and Bloedel, J.R. (1997). Effects of inactivating  
471 individual cerebellar nuclei on the performance and retention of an operantly conditioned  
472 forelimb movement. *J. Neurophysiol.* 78, 939-959.
- 473  
474 Miller, A.D., and Brooks, V.B. (1982). Parallel pathways for movement initiation of monkeys.  
475 *Exp. Brain Res.* 45, 328-332.
- 476

- 477 Mink, J.W., and Thach, W.T. (1991). Basal ganglia motor control. II. Late pallidal timing relative  
478 to movement onset and inconsistent pallidal coding of movement parameters. *J. Neurophysiol.*  
479 *65*, 301-329.
- 480  
481 Mushiake, H., and Strick, P.L. (1993). Preferential activity of dentate neurons during limb  
482 movements guided by vision. *J. Neurophysiol.* *70*, 2660-2664.
- 483  
484 Ohmae, S., Kunimatsu, J., and Tanaka, M. (2017). Cerebellar Roles in Self-Timing for Sub-  
485 and Supra-Second Intervals. *J. Neurosci.* *37*, 3511-3522.
- 486  
487 Person, R.J., Andrezik, J.A., Dormer, K.J., and Foreman, R.D. (1986). Fastigial nucleus  
488 projections in the midbrain and thalamus in dogs. *Neuroscience* *18*, 105-120.
- 489  
490 Reep, R.L., Goodwin, G.S., and Corwin, J.V. (1990). Topographic organization in the  
491 corticocortical connections of medial agranular cortex in rats. *J. Comp. Neurol.* *294*, 262-280.
- 492  
493 Requin, J., Lecas, J.C., and Vitton, N. (1990). A comparison of preparation-related neuronal  
494 activity changes in the prefrontal, premotor, primary motor and posterior parietal areas of the  
495 monkey cortex: preliminary results. *Neurosci. Lett.* *111*, 151-156.
- 496  
497 Rispal-Padel, L., Cicirata, F., and Pons, C. (1982). Cerebellar nuclear topography of simple  
498 and synergistic movements in the alert baboon (*Papio papio*). *Exp. Brain Res.* *47*, 365-380.
- 499  
500 Rispal-Padel, L., Harnois, C., and Troiani, D. (1987). Converging cerebellofugal inputs to the  
501 thalamus. I. Mapping of monosynaptic field potentials in the ventrolateral nucleus of the  
502 thalamus. *Exp. Brain Res.* *68*, 47-58.
- 503  
504 Russo, A.A., Bittner, S.R., Perkins, S.M., Seely, J.S., London, B.M., Lara, A.H., Miri, A.,  
505 Marshall, N.J., Kohn, A., Jessell, T.M., et al. (2018). Motor Cortex Embeds Muscle-like  
506 Commands in an Untangled Population Response. *Neuron* *97*, 953-966 e958.
- 507

- 508 Sakai, S.T., Inase, M., and Tanji, J. (1996). Comparison of cerebellothalamic and  
509 pallidothalamic projections in the monkey (*Macaca fuscata*): a double anterograde labeling  
510 study. *J. Comp. Neurol.* 368, 215-228.
- 511
- 512 Sauerbrei, B., Guo, J., Mischianti, M., Guo, W., Kabra, M., Verma, N., Branson, K., & Hantman,  
513 A. (2018). Motor cortex is an input-driven dynamical system controlling dexterous movement.  
514 *BioRxiv* 266320; doi: <https://doi.org/10.1101/266320>.
- 515
- 516 Schiemann, J., Puggioni, P., Dacre, J., Pelko, M., Domanski, A., van Rossum, M.C., and  
517 Duguid, I. (2015). Cellular Mechanisms Underlying Behavioral State-Dependent Bidirectional  
518 Modulation of Motor Cortex Output. *Cell Reports* 26;11(8):1319-30.
- 519
- 520 Spidalieri, G., Busby, L., and Lamarre, Y. (1983). Fast ballistic arm movements triggered by  
521 visual, auditory, and somesthetic stimuli in the monkey. II. Effects of unilateral dentate lesion  
522 on discharge of precentral cortical neurons and reaction time. *J. Neurophysiol.* 50, 1359-1379.
- 523
- 524 Strick, P.L. (1976). Activity of ventrolateral thalamic neurons during arm movement. *J.*  
525 *Neurophysiol.* 39, 1032-1044.
- 526
- 527 Suresh, A.K., Goodman, J. M., Okorokova, E., Kaufman, M. T., Hatsopoulos, N. G. &  
528 Bensmaia, S. J. (2019). Neural population dynamics in motor cortex are different for reach  
529 and grasp. *BioRxiv* 667196; doi: <https://doi.org/10.1101/667196>.
- 530
- 531 Tanaka, Y.H., Tanaka, Y.R., Kondo, M., Terada, S.I., Kawaguchi, Y., and Matsuzaki, M.  
532 (2018). Thalamocortical Axonal Activity in Motor Cortex Exhibits Layer-Specific Dynamics  
533 during Motor Learning. *Neuron* 100, 244-258 e212.
- 534
- 535 Thach, W.T. (1975). Timing of activity in cerebellar dentate nucleus and cerebral motor cortex  
536 during prompt volitional movement. *Brain Res.* 88, 233-241.
- 537

538 Thach, W.T. (1978). Correlation of neural discharge with pattern and force of muscular activity,  
539 joint position, and direction of intended next movement in motor cortex and cerebellum. *J.*  
540 *Neurophysiol.* 41, 654-676.

541  
542 Thach, W.T. (2013). Does the cerebellum initiate movement. *Cerebellum* 13, 139-150.

543  
544 Thura, D., and Cisek, P. (2017). The Basal Ganglia Do Not Select Reach Targets but Control  
545 the Urgency of Commitment. *Neuron* 95(5), 1160-1170.

546  
547 van Donkelaar, P., Stein, J.F., Passingham, R.E., and Miall, R.C. (2000). Temporary  
548 inactivation in the primate motor thalamus during visually triggered and internally generated  
549 limb movements. *J. Neurophysiol.* 83, 2780-2790.

550  
551 Williams, S.F., and Herberg, L.J. (1987). Motivational vs. motor effects of striatal and pallidal  
552 gabergeric projections to subthalamic and entopeduncular nuclei, ventromedial thalamus, and  
553 ventral globus pallidus. *Pharmacol. Biochem. Behav.* 26, 49-55.

554

## 555 **Acknowledgements**

556 We are grateful to Tiago Branco, Benjamin Grewe, Jan Gründemann, Matthew Nolan, Gülsen  
557 Sürmeli, Brett Mensh and members of the Nolan and Duguid labs for experimental discussions  
558 and for comments on the manuscript. Nick Steinmetz for the suggested design of the author  
559 contribution matrix. Pseudotyped SADΔG-mCherry(EnvA) rabies virus was a generous gift  
560 from Edward Callaway (Salk Institute for Biological Studies) to A.H. AAV-GCaMP6s was a gift  
561 from Douglas Kim & GENIE Project (Addgene 100844-AAV1). pACAGW-ChR2-Venus-AAV  
562 was a gift from Karel Svoboda (Addgene plasmid #20071) and packaged by Christina McClure  
563 and Innes Jarmson (Nolan Lab, University of Edinburgh). Confocal microscopy was performed  
564 in the IMPACT Imaging Facility at the University of Edinburgh. We thank Marie Zechner for  
565 assistance with graphic design. Research was supported by grants from the Biotechnology  
566 and Biological Sciences Research Council (BB/R018537/1), DFG fellowship program  
567 (SCH11267/2-1 to J.S. and AM 443/1-1 to J.A.), the Shirley Foundation, Howard Hughes

568 Medical Institute (A.H. and C-C.H.) and a Wellcome Senior Research Fellowship  
 569 (110131/Z/15/Z) to I.D.

570

571 **Author contributions**

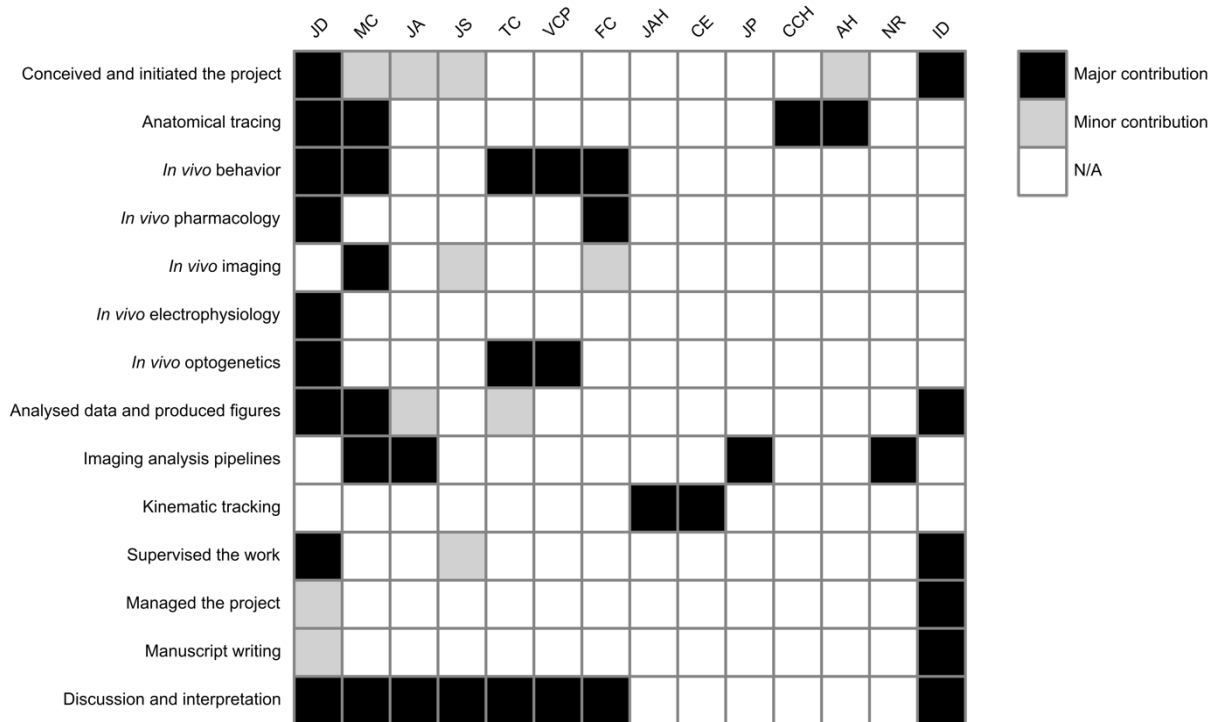

572

573

574 **Methods**

575 **Animal husbandry and general surgery**

576 Male adult C57BL/6J wild-type and Rbp4-Cre (MMRRC, stock 031125-UCD) mice (5-12  
 577 weeks old, 20-30g, one to six animals per cage) were maintained on a reversed 12:12 hour  
 578 light:dark cycle and provided *ad libitum* access to food and water. All experiments and  
 579 procedures were approved by the University of Edinburgh local ethical review committee and  
 580 performed under license from the UK Home Office in accordance with the Animal (Scientific  
 581 Procedures) Act 1986. Surgical procedures were performed under ~1.5% isoflurane  
 582 anesthesia and each animal received fluid replacement therapy (0.5ml sterile Ringer's  
 583 solution) to maintain fluid balance and buprenorphine (0.5 mg/kg) for post-operative pain relief.  
 584 A small lightweight headplate (0.75g) was implanted on the surface of the skull using

585 cyanoacrylate super glue and dental cement (Lang Dental, USA) and mice were left for 24-48  
586 hours to recover. Craniotomies were performed in a stereotactic frame (Kopf, USA) using a  
587 hand-held dentist drill with 0.5 mm burr (whole-cell patch-clamp recording  $\varnothing$ 300  $\mu$ m;  
588 viral/tracer/pharmacological compound injection  $\varnothing$ 500-1000  $\mu$ m), viral vectors and tracing  
589 compounds were delivered via pulled glass pipettes (5 $\mu$ l, Drummond, 10-20 nl/min) using an  
590 automated injection system (Model Picospritzer iii, Intracell).

591

### 592 **Monosynaptic retrograde rabies tracing**

593 For monosynaptic retrograde rabies tracing, conditional expression of TVA receptor was  
594 achieved by injecting 60nl of AAV2/1-CAG-FLEX-mTagBFP2-2A-TVA ( $9.0 \times 10^{12}$  genome  
595 copies per ml (GC/ml)) into contralateral M1<sub>FL</sub> (AP: 0.6, ML: 1.6, DV: -0.7 mm) of three Rbp4-  
596 Cre mice. For anterograde labelling of deep cerebellar nuclei projections to MTh<sub>DN/IPN</sub>, AAV2/1-  
597 CAG-EGFP ( $1.1 \times 10^{13}$  GC/ml) was vertically injected into contralateral dentate (AP: -6.2, ML:  
598 2.25, DV: -2.5 & -2.0 mm) and interpositus deep cerebellar nuclei (AP: -6.2, ML: 1.25, DV: 2.5  
599 & -2.0 mm), with 60 nl injected at each depth. Pseudotyped SAD $\Delta$ G-mCherry(EnvA) rabies  
600 virus (produced as previously described (Wickersham et al., 2007; Wickersham et al., 2010)  
601 was injected into M1<sub>FL</sub> (same coordinates as stated previously) three weeks after the initial  
602 injections. Mice were perfused seven days post-rabies virus injection. Sections (60  $\mu$ m) were  
603 cut, mounted and imaged at 20x using a Nanozoomer Slide Scanner (Hamamatsu). For all  
604 anatomical quantification, raw data images were manually referenced to the Paxinos &  
605 Franklin Mouse Brain Atlas (Paxinos & Franklin, 2008). The distribution of fluorescence was  
606 manually outlined and independently verified.

607

### 608 **Conventional retrograde tracing**

609 For retrograde tracing of M1<sub>FL</sub>-projecting motor thalamic neurons, a single ( $\sim$ 1 mm)  
610 craniotomy was performed above contralateral M1<sub>FL</sub> (AP: 0.6, ML: 1.6, DV: -0.7 mm), and 150  
611 nl of red (590 nm) retrobeads (Lumafuor Inc.) was injected at four points equidistant from the  
612 center of the craniotomy. After recovery, mice were returned to the home cage for  $\sim$ 7 days



613 before being anaesthetized with euthatal (0.10–0.15 ml) and transcardially perfused with 30  
614 ml of ice-cold PBS followed by 30 ml of 4% paraformaldehyde (PFA) in PBS solution. Brains  
615 were post-fixed in PFA overnight at 4°C and transferred to 10% sucrose solution for storage.  
616 Coronal sections (60 µm) were cut with a vibratome (Leica VT1000S), mounted using  
617 Vectashield mounting medium (H-1000, Vector Laboratories), and imaged using a laser  
618 scanning confocal microscope (Leica TCS-NT). To assess the density of M1<sub>FL</sub>-projecting  
619 neurons originating in the ventrolateral motor thalamus, 200nl of CTB-Alexa647 (Invitrogen)  
620 was injected into M1<sub>FL</sub> (AP: 0.6, ML: 1.6, DV: -0.7 mm). After 7 days post injection, mice were  
621 perfused (as described above) and 100µm sections were counter-stained with Nissl blue  
622 before being imaged with a Leica LSM800 confocal microscope. Cells were counted in a  
623 representative 300 x 300 µm region of the ventrolateral motor thalamus and counts were  
624 independently verified.

625

### 626 **Behavioral training**

627 After recovery from head plate surgery, mice were handled extensively before being head  
628 restrained and habituated to a custom lever push behavioral setup. Mice were trained to  
629 perform horizontal lever push movements (4 mm) in response to a 6kHz auditory cue in order  
630 to obtain a 4-8 µl water reward. To increase task engagement mice were placed on a water  
631 control paradigm (1 ml/day) and weighed daily to ensure body weight remained above 85% of  
632 baseline. Mice were trained once per day for 30 mins, with a quasi-random inter-trial-interval  
633 of 4-6s followed by presentation of an auditory cue. Mice responded within a 10 s window  
634 early in training, reduced to a 2 s window prior to recording, and were deemed ‘expert’ after  
635 achieving >90 rewards per session on two consecutive days. Lever movements during the ITI  
636 would result in a ‘lever reset’ and commencement of a subsequent ITI.

637

### 638 ***In vivo* pharmacology**

639 To assess the behavioral effects of M1<sub>FL</sub> / MTh<sub>DN/IPN</sub> inactivation, the contralateral forelimb was  
640 shaved under general anesthesia and the wrist, elbow and shoulder joints were marked with

641 black ink. Mice were allowed to recover for at least 60 mins before being head-restrained in  
642 the behavioral apparatus. After 5 min of baseline task execution, the lever was locked and a  
643 small volume of the GABA<sub>A</sub> receptor agonist muscimol (dissolved in external solution  
644 containing 150 mM NaCl, 2.5 mM KCl, 10 mM HEPES, 1.5 mM CaCl<sub>2</sub> and 1 mM MgCl<sub>2</sub>) or  
645 saline was injected into the target area (M1<sub>FL</sub>: 200 nl of 2 mM muscimol at each of 5 sites  
646 centered on AP: 0.6, ML: 1.6, DV: -0.7 mm; MTh<sub>DN/IPN</sub>: 200 nl of 1 mM muscimol, AP: -1.1, ML:  
647 1.0, DV: -3.4 mm). Mice were randomly assigned to drug or control groups, and experiments  
648 performed blinded. To confirm anatomical location of each drug injection, 1% w/v of red (590  
649 nm) retrobeads (Lumaflo Inc.) was included in the drug/saline solution. Behavioral metrics  
650 were analyzed in 5-minute epochs using a two-way repeated measures ANOVA to determine  
651 statistical significance with Bonferroni-Holm correction for multiple comparisons.

652

### 653 **GRIN lens imaging**

654 To perform population calcium imaging in motor thalamus we injected 200 nl of AAV1-Syn-  
655 GCaMP6s ( $2.9 \times 10^{13}$  GC/ml, Addgene 100844-AAV1) into contralateral MTh<sub>DN/IPN</sub> (AP: -1.1,  
656 ML: 1.0, DV: -3.4 mm) before implanting a lightweight headplate as described above. After 7-  
657 10 days, a gradient-index (GRIN) lens (Grintech NEM-060-15-15-520-S-1.0p; 600  $\mu$ m  
658 diameter, 4.83 mm length, 0.5 numerical aperture) was implanted as described previously (Xu  
659 et al., 2016). In brief, a sterile needle (1.1 mm OD) surrounding the GRIN lens was lowered to  
660 a depth of 3.2 mm and subsequently retracted leaving the lens at the desired depth. The lens  
661 was then secured in place with UV curing glue (Norland Products, USA) and dental cement  
662 (Lang Dental, USA). Fields of view were checked every 14 days for clarity and GCaMP6s  
663 expression. After 4-8 weeks mice began water restriction and behavioral training. Two-photon  
664 calcium imaging was performed in expert mice during task engagement with a 320 x 320  $\mu$ m  
665 field of view (600 x 600 pixels) at 40 Hz frame rate, using a Ti:Sapphire pulsed laser  
666 (Chameleon Vision-S, Coherent, CA, USA; < 70 fs pulse width, 80 MHz repetition rate) tuned  
667 to 920 nm wavelength with a 40x objective lens. For confirmation of GRIN lens location and  
668 viral expression, mice were perfused as described above and sections (100  $\mu$ m) were cut with

669 a vibratome, counterstained with Nissl blue, and imaged using a slide scanner (Zeiss  
670 Axioscan). GRIN lens location was determined using the Paxinos & Franklin Mouse Brain atlas  
671 (Paxinos & Franklin, 2008), and anatomical confirmation within MTh<sub>DN/IPN</sub> was used to  
672 determine data inclusion. Motion artefacts in the raw fluorescence videos were corrected using  
673 NoRMCorre (Pnevmatikakis et al., 2017). In brief, NoRMCorre performs non-rigid motion  
674 correction by splitting each FOV into overlapping patches, estimating the xy translation for  
675 each patch, and upsampling the patches to create a smooth motion field, correcting for non-  
676 uniform motion artefacts caused by raster scanning or brain movement. Regions of interest  
677 (ROIs, polygonal areas) were manually drawn in Fiji (Schindelin et al., 2012) and fluorescence  
678 signals were decontaminated and extracted using nmf\_sklearn to remove fluorescence  
679 originating from neuropil and neighboring cells (Keemink et al., 2018). Normalized  
680 fluorescence was calculated as  $\Delta F/F_0$ , where  $F_0$  was calculated as the 5th percentile of the  
681 1Hz low-pass filtered raw fluorescence signal and  $\Delta F = F - F_0$ . To define early responsive  
682 neurons, average  $\Delta F/F_0$  signals during baseline and peri-movement epochs were compared  
683 (baseline epoch = 500 ms pre-cue; movement epoch = -250 to +500 ms peri-movement) using  
684 a Wilcoxon rank sum test with a significance threshold of  $P < 0.01$ . The direction of the response  
685 was defined as suppressed or enhanced by comparing the median value of the  $\Delta F/F_0$  signal  
686 during both epochs. Late responsive suppressed/enhanced neurons were identified by  
687 comparing the 500 ms pre-cue baseline epoch with a 500 ms pre-reward epoch using a  
688 Wilcoxon rank sum test with a significance threshold of  $P < 0.01$ . For presentation, movement-  
689 aligned  $\Delta F/F_0$  signals were smoothed with the loess method using a 40-frame sliding window  
690 and baseline corrected to the mean  $\Delta F/F_0$  during the 500 ms pre-cue epoch. To investigate  
691 the relationship between  $\Delta F/F_0$  trajectories and reaction time, reaction times were split into  
692 thirds (short [0 – 350 ms], medium [350 - 900 ms] and long [ $>900$  ms]) and only FOVs with a  
693 sufficient number of trials per reaction time category were included in further analysis. The  
694 onset times of early enhanced neurons was calculated per trial for each FOV by employing a  
695 previously published onset detection algorithm using a slope sum function (SSF) (Zong et al.,  
696 2003) with the decision rule and window of the SSF adapted to calcium imaging data

697 (threshold 10% of peak, SSF window 375 ms, smoothed with a Savitzky Golay filter across 27  
698 frames with order 2). To reduce the influence of noisy individual traces biasing onset detection,  
699 each onset was determined as the median of 10,000 bootstrap samples. After calculating an  
700 onset for each trial, a kernel density estimate was calculated for the mean onset across trials.  
701 The area under this mean population kernel density estimate was calculated using numerical  
702 trapezoidal integration. The reliability index for each neuron was defined as the mean  
703 Pearson's correlation coefficient across pairs of trials in a defined window from -500 to +500  
704 ms peri-movement initiation. The signal-to-noise ratio was defined as the ratio of mean  
705 absolute peak  $\Delta F/F_0$  change (1s pre-cue to 2s post-movement) and  $\Delta F/F_0$  SD during the pre-  
706 cue baseline. Time-to-half-maximum  $\Delta F/F_0$  was calculated as the time from cue onset to 50%  
707 of the  $\Delta F/F_{\text{peak}}$  trial-to-trial.

708

### 709 ***In vivo* electrophysiology**

710 Whole-cell patch-clamp recordings targeted to layer 5B, 600–950  $\mu\text{m}$  from the pial surface,  
711 were obtained from awake head restrained mice. Signals were acquired at 20 kHz using a  
712 Multiclamp 700B amplifier (Molecular Devices) and filtered at 10 kHz using PClamp 10  
713 software in conjunction with a DigiData 1440 DAC interface (Molecular Devices). No bias  
714 current was injected during recordings and the membrane potential was not corrected for  
715 junction potential. Resting membrane potentials were recorded immediately after attaining the  
716 whole-cell configuration (break-in). Series resistances ( $R_s$ ) ranged from 23.6 to 45.5 M $\Omega$ .  
717 Patch pipettes (5.5–7.5 M $\Omega$ ) were filled with internal solution (285–295 mOsm) containing: 135  
718 mM K-gluconate, 4 mM KCl, 10 mM HEPES, 10 mM sodium phosphocreatine, 2 mM MgATP,  
719 2 mM  $\text{Na}_2\text{ATP}$ , 0.5 mM  $\text{Na}_2\text{GTP}$ , and 2 mg/ml biocytin (pH adjusted to 7.2 with KOH). External  
720 solution contained: 150 mM NaCl, 2.5 mM KCl, 10 mM HEPES, 1 mM  $\text{CaCl}_2$ , and 1 mM  $\text{MgCl}_2$   
721 (adjusted to pH 7.3 with NaOH). All electrophysiology recordings were analyzed using custom  
722 written scripts in MATLAB. Individual action potentials (APs) were detected with a wavelet-  
723 based algorithm (Nenadic and Burdick, 2005) and AP threshold was defined as the membrane  
724 potential ( $V_m$ ) at maximal  $d^2V/dt^2$  up to 3 ms before AP peak and manually verified. For

725 subthreshold  $V_m$  analysis APs were clipped by removing data points between -1 and +9 ms  
726 peri-AP threshold. Average AP firing frequencies were calculated by convolving spike times  
727 with a 50 ms Gaussian kernel. Significant changes in subthreshold  $V_m$  and AP firing frequency  
728 were defined by comparing bootstrapped 95% confidence intervals of mean movement-  
729 aligned  $V_m$  and AP frequency trajectories to zero (baseline epoch = 200 ms pre-cue;  
730 movement epoch = -100 to +100 ms peri-movement). Mean changes in  $V_m$  ( $\Delta V_m$ ) were  
731 calculated by subtracting the mean  $V_m$  during baseline (1s epoch prior to cue) from the mean  
732  $V_m$  during peri-movement epoch (-250 to +250 ms epoch when aligned to movement onset).  
733 All mean  $\Delta V_m$  trajectories were decimated and median filtered with a 50 ms sliding window.  
734 Population mean  $\Delta V_m$  trajectories were normalized to the largest absolute mean  $\Delta V_m$  value in  
735 a 1.5 second peri-movement window. Peri-movement  $\Delta V_m$  onsets were detected as the 10%  
736 rise-time of  $V_m$  trajectories when aligned to movement. To compare subthreshold  $V_m$  dynamics  
737 during hit and miss trials, cue-aligned periods of  $V_m$  were baseline subtracted and the area  
738 under the  $|\Delta V_m|$  trajectory from cue onset to median reward delivery was calculated via  
739 trapezoidal numerical integration with a 50 ms sample rate. We calculated the Pearson  
740 correlation coefficient between  $\Delta V_m$  and  $\Delta$ firing rate for all significantly modulated neurons.

741

## 742 **Immunohistochemistry**

743 To morphologically identify neurons after recording, deeply anesthetized mice were  
744 transcardially perfused with 4 % paraformaldehyde. Mouse brains were post-fixed overnight  
745 and coronal sections (60  $\mu$ m) of M1<sub>FL</sub> were cut with a vibratome (Leica VT1000 S). For neuron  
746 location recovery, sections were incubated in streptavidin AlexaFluor-488 (1:1000, Molecular  
747 Probes) in 0.1 M phosphate buffered saline (PBS) containing 0.5 % Triton X-100, mounted  
748 (Vectashield, VectorLabs), imaged using a Zeiss LSM 510 Meta confocal microscope (20x  
749 objective) and referenced to the Franklin and Paxinos Mouse Brain Atlas (Paxinos & Franklin,  
750 2008). To identify projection targets of individually recorded neuron (Schiemann et al., 2015),  
751 sections were further processed by heat-mediated antigen retrieval in 10 mM sodium citrate  
752 buffer (pH 6.0) for 3 hrs at 80°C. Sections were incubated in blocking solution (0.01 M PBS,

753 10 % normal goat serum (v/v), 0.5 % Triton X-100 (v/v)) at 22 °C for 2 hrs and incubated  
754 overnight at 22 °C in a primary antibody mixture containing mouse monoclonal anti-Satb2  
755 (1:200, Cat. No. ab51502, Abcam) and rat monoclonal anti-Ctip2 (1:1000, Cat. No. ab18465,  
756 Abcam) dissolved in carrier solution (0.01 M PBS, 1 % goat serum, 0.5 % Triton X-100). Slices  
757 were then incubated overnight at 22 °C in a secondary antibody mixture containing AlexaFluor-  
758 568 goat anti-mouse (1:750, Molecular Probes) and AlexaFluor-647 goat anti-rat (1:750,  
759 Molecular Probes) dissolved in carrier solution (0.01 M PBS, 1 % goat serum, 0.5 % Triton X-  
760 100), mounted and imaged using a Nikon A1R FLIM confocal microscope (Nikon, Europe).  
761 Images were analyzed offline using Fiji.

762

### 763 **Optogenetic experiments**

764 For optogenetic activation of MTh<sub>DN/IPN</sub> neurons or axon terminals in M1<sub>FL</sub>, 250 nl of AAV2/1-  
765 CAG-GhR2-GFP ( $4.7 \times 10^{11}$  GC/ml, Addgene 20071; control virus: AAV2-CAG-mCherry  
766 ( $5.2 \times 10^{11}$  GC/ml)) was injected unilaterally into contralateral MTh<sub>DN/IPN</sub> (AP: -1.1, ML: 1.0, DV:  
767 -3.4 mm). For direct MTh<sub>DN/IPN</sub> stimulation, an optic fiber (200  $\mu$ m diameter, 0.39 NA; Thorlabs)  
768 was implanted ~300  $\mu$ m dorsal to the viral injection site and trains of pulsed 473 nm light (8  
769 mW, 16.6 Hz pulse frequency, 33.3% duty cycle) were delivered using a solid-state laser  
770 (DPSS, Civillaser, China) and shutter (LS3S2T1, Uniblitz) controlled by an Arduino control  
771 system. For direct stimulation of MTh<sub>DN/IPN</sub> axon terminals, tapered optic fibers (Optogenix,  
772 Italy) were implanted to a depth of 1 mm at the center of M1<sub>FL</sub> (AP: 0.6, ML: 1.6, DV: -1.0 mm)  
773 and 12 mW, 473 nm light was delivered with parameters as described above. Prior to  
774 optogenetic stimulation experiments, mice were trained to expert level performance and  
775 habituated to light emanating from an uncoupled optic fiber and the sound of shutter activation.  
776 During recording sessions, mice were exposed to 3 different trial types: (1) cue and shutter;  
777 (2) laser and shutter; and (3) shutter only. Trials were presented with the following pattern: 1,  
778 1, 3, 1, 1, 2,... repeating for 30 minutes. For the majority of mice, direct MTh<sub>DN/IPN</sub> stimulation  
779 was followed by MTh<sub>DN/IPN</sub> neuron axon terminal stimulation in M1<sub>FL</sub> on the following day. In  
780 some experiments, whole-cell patch-clamp recordings (as described above) were performed

781 in combination with direct MTh<sub>DN/IPN</sub> stimulation. To investigate behavioral context, mice which  
782 had previously experienced MTh<sub>DN/IPN</sub> stimulation were head restrained above a 3D printed  
783 baseplate (Wanhao i3 Duplicator) without support/movable levers or reward spout and  
784 habituated to the altered behavioral context for 2 sessions, interleaved with normal training to  
785 ensure that the cued goal-directed motor behavior was not extinguished. To compare effects  
786 of MTh<sub>DN/IPN</sub> stimulation in the learned and altered behavioral contexts, mice first underwent a  
787 15 minute optogenetic stimulation protocol in the learned context, then returned to their home  
788 cage for 5 mins before being exposed to a 15 minute optogenetic stimulation protocol in the  
789 altered behavioral context. For histological confirmation of the injection site and optic fiber  
790 placement, mice were perfused and post-fixed for 2 additional days, before tissue slices were  
791 collected and imaged as described above. The center of the optic fiber (COF) was defined as  
792 the most ventral extent of the optic fiber tract across all slices from each brain as measured  
793 from the pial surface. Where tracts of equal depth were present, the coronal section containing  
794 the largest diameter tract tip was identified as the COF. The expression of ChR2-Venus was  
795 coarsely defined by first referencing three coronal slices (120  $\mu$ m spacing) centered on the  
796 COF to the Franklin & Paxinos Mouse Brain Atlas (Paxinos & Franklin, 2008) before manually  
797 evaluating the proportion of each of the principle motor thalamic nuclei (AM, anteromedial; VL,  
798 ventrolateral; VPM, ventral posteromedial nucleus; VPL, ventral posteromedial; VM,  
799 ventromedial) containing fluorescence, and categorizing three levels based on expression  
800 covering 0%, 0-50% and 50-100% of each nucleus. Proportions of push-like movements in  
801 cue- and laser- trials were calculated by correcting for the behavioral error rate, i.e. subtracting  
802 the proportion of pushes observed in shutter only trials (3) to obtain a lower bound for induced  
803 movement proportion.  $\Delta V_m$  trajectories for both cue-evoked and optogenetic stimulation-  
804 evoked movement trials were calculated as described above, and trial-by-trial  $\Delta V_m$  changes  
805 were based on comparing the 200ms pre-laser or pre-cue epoch with the 200 ms peri-  
806 movement epoch within each trial. We calculated the Pearson correlation coefficient between  
807 cue- and ChR2-evoked  $\Delta V_m$  in hit trials.

808

## 809 **Forelimb kinematic tracking**

810 Behavior from all experimental and habituation days was recorded at 300 frames per second  
811 using a high-speed camera (Pharmacological experiments: Genie HM640, Dalsa; optogenetic  
812 experiments: Mako U U-029, Allied Vision) and acquired with Streampix 7 (Norpix), synced  
813 using a TTL output from the DigiData 1440 DAC interface. Forepaw and wrist positions during  
814 pharmacological inactivation experiments were calculated by tracking forepaw markers using  
815 a custom written tracking script in Blender (2.79b, Blender Foundation). Contour plots of paw  
816 positions densities were calculated during 2 s epochs prior to cue presentation by sorting the  
817 paw positions by distance from the mean and computing 20 increasingly inclusive convex hulls  
818 around 5% portions of the data to define each contour level. Directional tracking of forelimb  
819 movement in the learned/altered behavioral context was performed using Deep Lab Cut, a  
820 markerless video tracking toolbox (Mathis et al., 2018). Paw trajectories were plotted for the  
821 100 ms post movement onset epoch in the learned behavioral context (LBC), and for the  
822 altered behavioral context (ABC) we plotted trajectories in the epoch 100 ms after the LBC  
823 median reaction time, due to a lack of movement in the majority of ABC trials. Push-like  
824 movements were defined as trials with an initial paw trajectory vector between 100° and 210°.  
825 To measure gross forelimb movement, we defined a region-of-interest (ROI) covering the  
826 contralateral (left) forelimb and calculated the motion index (MI) for each successive frame  $f$   
827 as  $MI_f = \sum_{i=1}^N (c_{f+1,i} - c_{f,i})^2$ , where  $c_{f,i}$  is the grayscale level of the pixel  $i$  of the ROI,  $N$  pixels  
828 per ROI<sup>32</sup>. Movement trials were defined by calculating the  $MI > \theta$  within 500 ms of cue/laser  
829 onset, with the threshold  $\theta$  defined as two standard deviations above mean MI.

830

## 831 **Statistics**

832 Data analysis was performed using custom-written scripts in MATLAB 2019a and code will be  
833 made available on request. Data are reported as mean  $\pm$  95% bootstrapped confidence  
834 interval, 10,000 bootstrap samples, unless otherwise indicated. Where multiple  
835 measurements were made from a single animal, suitable weights were used to evaluate



836 summary population statistics and to obtain unbiased bootstrap samples. Statistical  
837 comparisons using the significance tests stated in the main text were made in MATLAB 2019a,  
838 and statistical significance was considered when  $P < 0.05$  unless otherwise stated. Data were  
839 tested for normality with the Shapiro–Wilk test, and parametric/non-parametric tests were  
840 used as appropriate and as detailed in the text.

841

## 842 **References**

843 Keemink, S. W. et al. FISSA: A neuropil decontamination toolbox for calcium imaging  
844 signals. *Sci Rep* 8, 3493 (2018).

845

846 Mathis, A. et al. DeepLabCut: markerless pose estimation of user-defined body parts with  
847 deep learning. *Nat Neurosci* 21, 1281-1289 (2018).

848

849 Nenadic, Z. & Burdick, J. W. Spike detection using the continuous wavelet transform. *IEEE*  
850 *Trans Biomed Eng* 52, 74-87 (2005).

851

852 Paxinos, G., & Franklin, K. B. J. *The Mouse Brain in Stereotaxic Coordinates, Compact: The*  
853 *Coronal Plates and Diagrams*. 3rd Edition, 256 (Elsevier Science Publishing Co Inc,  
854 Academic Press Inc, 2008).

855

856 Pnevmatikakis, E. A. & Giovannucci, A. NoRMCorre: An online algorithm for piecewise rigid  
857 motion correction of calcium imaging data. *J Neurosci Methods* 291, 83-94 (2017).

858

859 Schindelin, J. et al. Fiji: an open-source platform for biological-image analysis. *Nat Methods*  
860 9, 676-682 (2012).

861

862 Wickersham, I. R., Finke, S., Conzelmann, K. K. & Callaway, E. M. Retrograde neuronal  
863 tracing with a deletion-mutant rabies virus. *Nat Methods* 4, 47-49 (2007).

864

865 Wickersham, I. R., Sullivan, H. A. & Seung, H. S. Production of glycoprotein-deleted rabies  
866 viruses for monosynaptic tracing and high-level gene expression in neurons. Nat Protoc 5,  
867 595-606 (2010).

868  
869 Xu C, Krabbe S, Gründemann J, Botta P, Fadok J.P., Osakada F, Saur D, Grewe B.F.,  
870 Schnitzer M.J., Callaway E.M., Lüthi A. Distinct Hippocampal Pathways Mediate Dissociable  
871 Roles of Context in Memory Retrieval. Cell 167(4), 961-972 (2016).

872  
873 Zong, W., Heldt, T., Moody, G.B. and Mark, R.G. An Open-Source Algorithm to Detect Onset  
874 of Arterial Blood Pressure Pulses. Computers in Cardiology 30, 4 (2003).

875

876

877

878

879
